# Supplementary material
Source: MDPI journal article supplement (https://www.mdpi.com/2073-4441/10/12/1709)
Supplement: s1 [file s1]

## Supplementary Materials

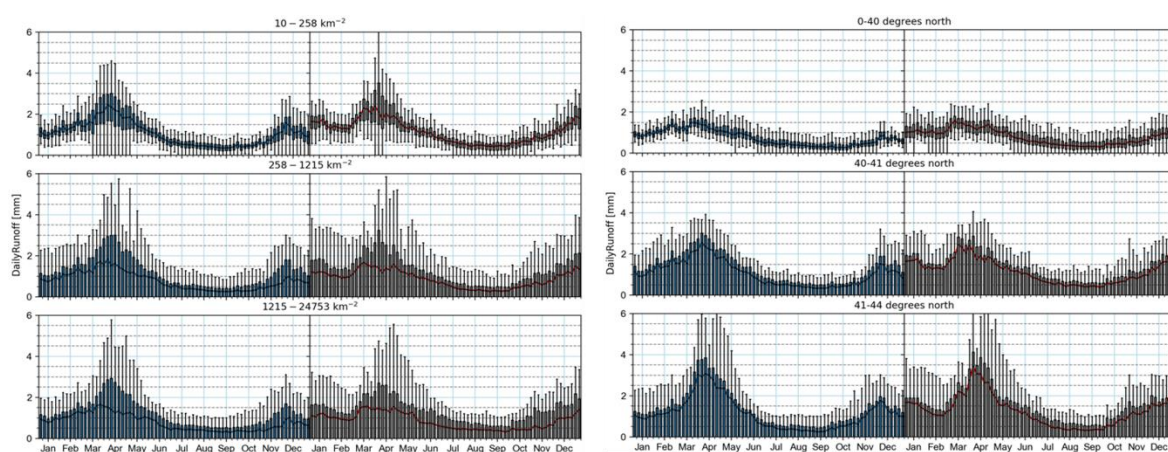

*Figure 1 Supplement. Synthetic hydrographs for 1981(Blue) and 2015 (Red) for area and latitude*
